# Supplementary material
Source: PubMed Central journal article supplement (PMC4816130)
Supplement: cr2015142x5.pdf [file cr2015142x5.pdf]

Table S2. Small molecules used in chemical reprogramming

| Full Name           | Abbreviation | Concentration ( $\mu\text{M}$ ) | Source                        | Molecular Weight | Structure                                                                           |
|---------------------|--------------|---------------------------------|-------------------------------|------------------|-------------------------------------------------------------------------------------|
| Valproic acid       | VPA, V       | 500                             | Sigma, cat. no.P4543          | 166.19           | 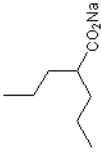   |
| CHIR 99021          | CHIR, C      | 10-15                           | Synthesized by WUXI APPTEC    | 465.34           |    |
| 616452              | 6            | 2-20                            | Synthesized by WUXI APPTEC    | 400.34           |    |
| Tranylcypromine     | T            | 10                              | Enzo, cat. no. BML-EI217-0005 | 182.23           |    |
| Forskolin           | F            | 10-20                           | Enzo, cat. no. BML-CN100-0100 | 410.50           |    |
| 3-deazaneplanocin A | DZNep, Z     | 0.05                            | Synthesized by WUXI APPTEC    | 262.26           |   |
| AM580               | A            | 0.05                            | Tocris, cat. no. 0760         | 351.44           |  |
| TTNPB               | N            | 1                               | Tocris, cat. no.0761          | 348.48           |  |

(continued)

| Full Name | Abbreviation | Concentration ( $\mu\text{M}$ ) | Source                      | Molecular Weight | Structure                                                                          |
|-----------|--------------|---------------------------------|-----------------------------|------------------|------------------------------------------------------------------------------------|
| Ch 55     | 5            | 1                               | Tocris, cat. no. 2020       | 364.47           | 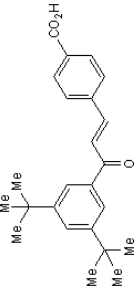  |
| EPZ004777 | EPZ, E       | 5                               | Synthesized by WUXI/APPTTEC | 539.67           |   |
| PD0325901 | PD03, P      | 1                               | Synthesized by WUXI/APPTTEC | 482.19           |  |
