# Supplementary material
Source: PubMed Central journal article supplement (PMC4816130)
Supplement: cr2015142x6.pdf [file cr2015142x6.pdf]

**Table S3. Summary of CiPSCs characterization**

| Clone                                        | Initial cell type | Strain                    | Genomic PCR | RT-PCR | RNA-seq | IF  | Karyotype | Methylation | Teratoma | Chimeric |
|----------------------------------------------|-------------------|---------------------------|-------------|--------|---------|-----|-----------|-------------|----------|----------|
| IEC-CiPSC-10                                 | embryonic IEC     | OG(C57) X ICR             | Yes         | Yes    | Yes     | Yes | Yes       | Yes         | Yes      | Yes      |
| IEC-CiPSC-13                                 | embryonic IEC     | OG(C57) X ICR             | Yes         | Yes    | Yes     | Yes | Yes       | Yes         | Yes      | Yes      |
| p <i>Villin</i> -Cre-tdTomato<br>IEC-CiPSC-3 | embryonic IEC     | C57BL/6JNju X<br>C57BL/6J | Yes         | Yes    | N/A     | Yes | N/A       | N/A         | N/A      | N/A      |
| p <i>Villin</i> -Cre-tdTomato<br>IEC-CiPSC-4 | embryonic IEC     | C57BL/6JNju X<br>C57BL/6J | Yes         | Yes    | N/A     | Yes | Yes       | N/A         | N/A      | Yes      |
| NSC-CiPC-1                                   | embryonic NSC     | OG(C57) X ICR             | Yes         | Yes    | Yes     | Yes | N/A       | N/A         | Yes      | Yes      |
| NSC-CiPC-2                                   | embryonic NSC     | OG(C57) X ICR             | Yes         | Yes    | Yes     | Yes | Yes       | Yes         | Yes      | Yes      |
| NSC-CiPC-3                                   | embryonic NSC     | OG(C57) X ICR             | Yes         | Yes    | N/A     | Yes | Yes       | N/A         | Yes      | Yes      |
| NSC-CiPC-4                                   | embryonic NSC     | OG(C57) X ICR             | Yes         | Yes    | Yes     | Yes | N/A       | N/A         | N/A      | Yes      |
| NSC-CiPC-5                                   | embryonic NSC     | OG(C57) X ICR             | Yes         | Yes    | N/A     | Yes | N/A       | N/A         | N/A      | N/A      |
| NSC-CiPC-6                                   | embryonic NSC     | OG(C57) X ICR             | Yes         | Yes    | N/A     | Yes | Yes       | Yes         | N/A      | Yes      |
| NSC-CiPC-7                                   | postnatal NSC     | OG(C57) X ICR             | Yes         | Yes    | N/A     | Yes | N/A       | N/A         | N/A      | N/A      |
| NSC-CiPC-8                                   | postnatal NSC     | OG(C57) X ICR             | Yes         | Yes    | N/A     | Yes | N/A       | N/A         | N/A      | N/A      |
| NSC-CiPC-9                                   | postnatal NSC     | OG(C57) X ICR             | Yes         | Yes    | N/A     | Yes | N/A       | N/A         | N/A      | N/A      |
| NSC-CiPC-10                                  | postnatal NSC     | OG(C57) X ICR             | Yes         | Yes    | N/A     | Yes | N/A       | N/A         | N/A      | N/A      |
