# Supplementary material
Source: PubMed Central journal article supplement (PMC4816130)
Supplement: cr2015142x7.pdf [file cr2015142x7.pdf]

**Table S4. primer sets for PCR reactions**

|                                 | Forward (5' to 3') | Reverse (5' to 3')             |                               |
|---------------------------------|--------------------|--------------------------------|-------------------------------|
|                                 | mqActb             | CATTGCTGACAGGATGCAGAAGG        | TGCTGGAAGGTGGACAGTGAGG        |
|                                 | mqGapdh            | CATCACTGCCACCCAGAAGACTG        | ATGCCAGTGAGCTTCCCGTTCAG       |
|                                 | mqGata4            | GAGCTGGCCTGCGATGTCTGAGTG       | AAACGGAAGCCCAAGAACCTGAAT      |
|                                 | mqGata6            | TGAGGTGGTCGCTTGTGTAG           | ATGGCGTAGAAATGCTGAGG          |
|                                 | mqNanog            | GAACGCCTCATCAATGCCTGCA         | GAATCAGGGCTGCCTGAAGAG         |
|                                 | mqOct4             | CAGCAGATCACTCACATCGCCA         | GCCTCATACTTCTCGTTGGG          |
| Primer for qRT-PCR              | mqRex1             | GAGACTGAGGAAGATGGCTTCC         | CTGGCGAGAAAGGTTTTGCTCC        |
|                                 | mqSall4            | CAATAGCCAAGCCGGAAGTGTC         | AAAGGTGGGCTGTGCTCGGATA        |
|                                 | mqSox17            | GTCAACGCCTTCCAAGACTTG          | GTAAAGGTGAAAGGCGAGGTG         |
|                                 | mqSox2             | AACGGCAGCTACAGCATGATGC         | CGAGCTGGTCATGGAGTTGTAC        |
|                                 | mqEsrrb            | GTGGCTGAGGGCATCAATG            | AACCGAATGTCGTCCGAAGAC         |
|                                 | mqLin28a           | CCGCAGTTGTAGCACCTGTCT          | GAAGAACATGCAGAAGCGAAGA        |
|                                 | mqDppa2            | GCGTAGCGTAGTCTGTGTTTG          | TCAACGAGAACCAATCTGAGGA        |
| Primer for bisulfate sequencing | mOct4-bs           | GGAGTGGTTTTGAAATAATTG          | TCCAACCCTACTAACCCTACCC        |
|                                 | mNanog-bs          | GATTTTGTAGGTGGGATTAATTGTGAATTT | ACCAAAAAACCCACACTCATATCAATATA |
